# Supplementary material
Source: MDPI journal article supplement (https://www.mdpi.com/search?q=diversity-10-00109)
Supplement: s001 [file diversity-10-00109-s001.pdf]

Supplementary Figure

Figure S1. Isotype of *Ctenium serpentinum* Steud "île de Miel", Jardin 124 B, P (Muséum National d'Histoire Naturelle, Paris (France), Collection: Vascular plants (P), Specimen P00439449).

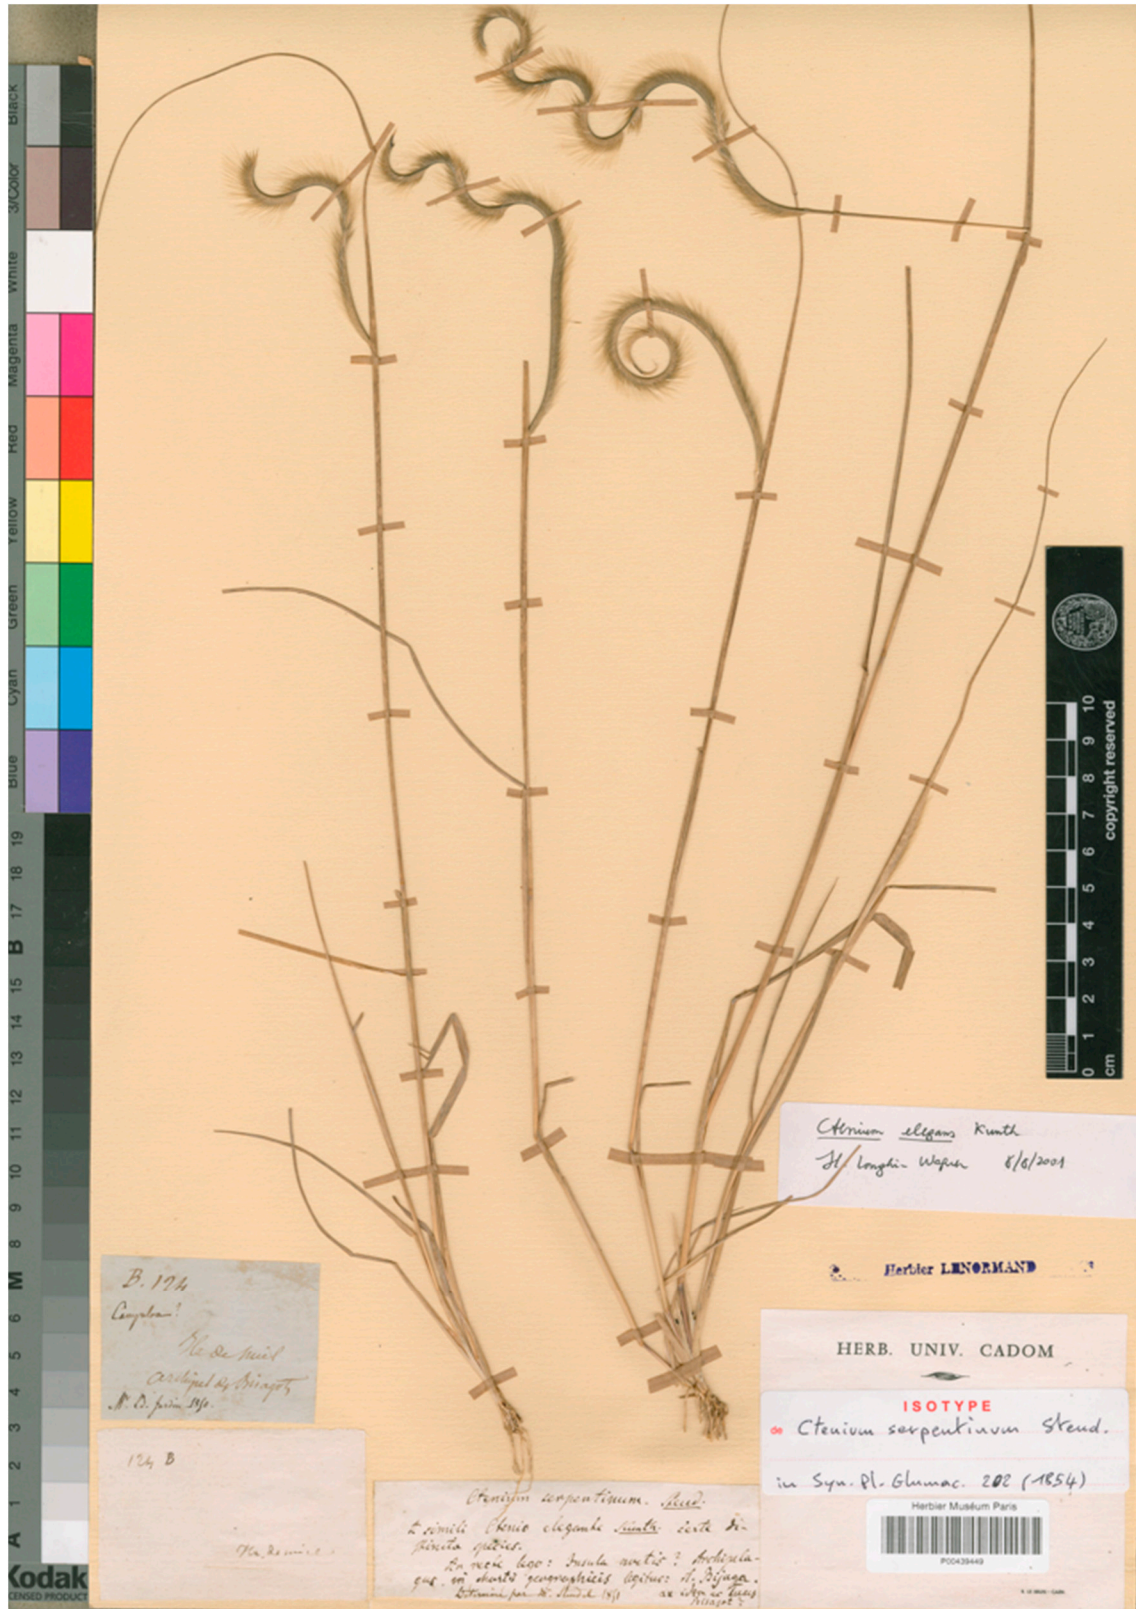

## Supplementary Tables

**Table 1S:** Édélestan Jardin: the first list of plants collected in Bijagós Islands (1845-48).

| Herbarium specimens: N°/collection date | Specimen barcode number* | Family         | Species name and [Data source**]     | Notes in Jardin works                                                                               | Species name (revised)                                         | Notes and distribution in Guinea-Bissau***                                                                                                                                   |
|-----------------------------------------|--------------------------|----------------|--------------------------------------|-----------------------------------------------------------------------------------------------------|----------------------------------------------------------------|------------------------------------------------------------------------------------------------------------------------------------------------------------------------------|
| <b>PHANEROGAMIC</b>                     |                          |                |                                      |                                                                                                     |                                                                |                                                                                                                                                                              |
|                                         |                          | Acanthaceae    | <i>Barleria</i> [1]                  | “Bissagos (Ile-de-Miel)” [2]                                                                        | <i>Barleria oenotheroides</i> Dum. Cours.                      | Probably <i>Barleria oenotheroides</i> , the only <i>Barleria</i> species reported for Guinea-Bissau (N, S).                                                                 |
|                                         |                          | Amaranthaceae  | <i>Celosia trigyna</i> L. [1]        |                                                                                                     | <i>Celosia trigyna</i> L.                                      | Reported for Guinea-Bissau (N, S, E, B).                                                                                                                                     |
|                                         |                          | Apocynaceae    | Asclepiadeae [1]                     |                                                                                                     | Unknown                                                        |                                                                                                                                                                              |
| 39 B / 1847                             | P00069789                | Asteraceae     | [3]                                  |                                                                                                     | <i>Aspilia kotschyi</i> (Sch.Bip. ex Hochst.) Oliv.            | Reported for Guinea-Bissau (B).                                                                                                                                              |
| B 39 / September 1847                   | P00069790                | Asteraceae     | [3]                                  |                                                                                                     | <i>Aspilia kotschyi</i> (Sch.Bip. ex Hochst.) Oliv.            | Reported for Guinea-Bissau (B).                                                                                                                                              |
| B 128                                   | P020388                  | Asteraceae     | [3]                                  |                                                                                                     | <i>Vernonia colorata</i> (Willd.) Drake subsp. <i>colorata</i> | Reported for Guinea-Bissau (N, S, E, B).                                                                                                                                     |
| B 128                                   | P020389                  | Asteraceae     | [3]                                  |                                                                                                     | <i>Vernonia colorata</i> (Willd.) Drake subsp. <i>colorata</i> | Reported for Guinea-Bissau (N, S, E, B).                                                                                                                                     |
|                                         |                          | Commelinaceae  | <i>Commelina</i> [1]                 |                                                                                                     | Unowned                                                        | Several species are reported for Guinea-Bissau.                                                                                                                              |
|                                         |                          | Convolvulaceae | <i>Convolvulus</i> , two species [1] |                                                                                                     |                                                                | This genus does not occur in Guinea-Bissau. However, 33 native species of Convolvulaceae are present, among which several were previously classified as <i>Convolvulus</i> . |
| 202 / 1847                              | P00568955                | Cyperaceae     | <i>Cyperus</i> [1]                   | “ <i>Cyperus bulamensis</i> ...on trouve cette espèce à Boulam, île de l’archipel des Bissagos” [2] | <i>Cyperus esculentus</i> L.                                   | Holotype of <i>Cyperus bulamensis</i> Steud. Reported for Guinea-Bissau (E).                                                                                                 |

|  |  |               |                                                                      |                                               |                                               |                                                                                                                                                                                                                                       |
|--|--|---------------|----------------------------------------------------------------------|-----------------------------------------------|-----------------------------------------------|---------------------------------------------------------------------------------------------------------------------------------------------------------------------------------------------------------------------------------------|
|  |  | Cyperaceae    | <i>Cyperus margaritaceus</i> Wahl. [1]                               |                                               | <i>Cyperus margaritaceus</i> Vahl             | Reported for Guinea-Bissau (N, S).                                                                                                                                                                                                    |
|  |  | Fabaceae      | <i>Arachis hypogaea</i> [1]                                          |                                               | <i>Arachis hypogaea</i> L.                    | Introduced and cultivated species.                                                                                                                                                                                                    |
|  |  | Fabaceae      | <i>Eilemanthus</i> (a genus novum?) [1]                              |                                               | cf. <i>Indigofera</i>                         | The only species in genus <i>Eilemanthus</i> , <i>E. stobilifer</i> , was transferred to <i>Indigofera strobilifera</i> (Hochst.) Hochst. ex Baker subsp. <i>strobilifera</i> , not reported for Guinea-Bissau.                       |
|  |  | Fabaceae      | <i>Stylosanthes guineensis</i> G.Don [1]                             |                                               | <i>Stylosanthes erecta</i> P. Beauv.          | <i>Stylosanthes guineensis</i> is synonym of <i>Stylosanthes erecta</i> . This species has not been reported for Guinea-Bissau; however, it is present in neighbouring countries (e.g. Senegal).                                      |
|  |  | Lamiaceae     | <i>Phlomis?</i> [2]                                                  | “archipel des Bissagos” [2]                   | cf. <i>Haumaniastrum</i>                      | <i>Phlomis</i> is not found in Guinea-Bissau; only <i>Leonotis nepetifolia</i> (L.) R.Br. (= <i>Phlomis nepetifolia</i> L.) is reported for this country. However, the description suggests it may be a <i>Haumaniastrum</i> species. |
|  |  | Malvaceae     | <i>Adansonia digitata</i> L. [1]                                     |                                               | <i>Adansonia digitata</i> L.                  | Reported for Guinea-Bissau (N, S, B).                                                                                                                                                                                                 |
|  |  | Malvaceae     | <i>Sida decagyna</i> Schum. [1]                                      |                                               | <i>Sida cordifolia</i> L.                     | <i>S. decagyna</i> is synonym of <i>S. cordifolia</i> , reported for Guinea-Bissau (N, S, B).                                                                                                                                         |
|  |  | Malvaceae     | <i>Sida linearifolia</i> (an <i>S. linifoliae</i> Cav. differt?) [1] |                                               | <i>Sida linifolia</i> Juss. ex Cav.           | <i>Sida linearifolia</i> is synonym of <i>Sida linifolia</i> , reported for Guinea-Bissau (N, S, E, B).                                                                                                                               |
|  |  | Nyctaginaceae | <i>Boerhavia</i> [2]                                                 | “recueillie au Bissagos” [2]                  | <i>Boerhavia</i> sp.                          | Three species of <i>Boerhavia</i> are reported for Guinea-Bissau ( <i>B. coccinea</i> Mill., <i>B. diffusa</i> L. and <i>B. erecta</i> L.), but none to Bijagós.                                                                      |
|  |  | Orobanchaceae | <i>Buchnera</i> [1]                                                  | “des Bissagos” [2]                            | <i>Buchnera</i> sp.                           | Two species of <i>Buchnera</i> occur in Guinea-Bissau: <i>B. hispida</i> Buch.-Ham. ex D.Don and <i>B. leptostachya</i> Benth., the former reported for the Bijagós Isles.                                                            |
|  |  | Polypodiaceae | <i>Acrostichum alpicorne</i> Swartz, <i>furcatum</i> Forster [1]     | “croît sur les palmiers de l’île de Miel” [1] | <i>Platyterium stemaria</i> (P. Beauv.) Desv. | <i>Acrostichum alpicorne</i> is synonym of <i>Platyterium alpicorne</i> (Willemet) Desv., and is not present in Guinea-Bissau. <i>Platyterium stemaria</i> is the only species occurring in Guinea-Bissau (N, E, B).                  |

|                                       |                        |                |                                       |                                                                       |                                                    |                                                                                                                                                                                                        |
|---------------------------------------|------------------------|----------------|---------------------------------------|-----------------------------------------------------------------------|----------------------------------------------------|--------------------------------------------------------------------------------------------------------------------------------------------------------------------------------------------------------|
|                                       |                        | Plumbaginaceae | <i>Plumbago zeylanica</i> L. [1]      |                                                                       | <i>Plumbago zeylanica</i> L.                       | This is the only species of <i>Plumbago</i> reported for Guinea-Bissau (N, B).                                                                                                                         |
| 124 B                                 | P00439448<br>P00439449 | Poaceae        | <i>Campuloa</i> [1]                   | <i>Ctenium serpentinum</i> Steud. "île de Miel, une des Bissagos" [2] | <i>Ctenium elegans</i> Kunth                       | <i>Ctenium serpentinum</i> Steud.:<br>P00439448 - Holotype<br>P00439449 - Isotype<br><i>Ctenium serpentinum</i> is synonym of <i>Ctenium elegans</i> , a species occurring in Guinea-Bissau (N, E).    |
|                                       |                        | Poaceae        | <i>Perotis</i> [1]                    |                                                                       | <i>Perotis indica</i> (L.) Kuntze                  | This is the only <i>Perotis</i> species reported for Guinea-Bissau (N, S, B).<br>Asian species introduced in Tropical Africa.                                                                          |
|                                       |                        | Poaceae        | <i>Saccharum officinarum</i> L. [1]   |                                                                       | <i>Saccharum officinarum</i> L.                    | Introduced and cultivated species.                                                                                                                                                                     |
|                                       |                        | Poaceae        | <i>Setaria glauca</i> Nees [1]        |                                                                       | <i>Setaria pumila</i> (Poir.) Roem. & Schult.      | <i>Setaria glauca</i> auct. is synonym for <i>S. pumila</i> .<br>Reported for Guinea-Bissau (S, E).                                                                                                    |
|                                       |                        | Polygalaceae   | <i>Polygala</i> [1]                   |                                                                       | <i>Polygala</i> sp.                                | Eight species are reported for Guinea-Bissau.                                                                                                                                                          |
|                                       |                        | Rubiaceae      | <i>Kohautia</i> [1]                   | "de Cagnabac (Bissagos)" [2]                                          | <i>Kohautia</i> sp.                                | Two species occur in Guinea-Bissau - <i>K. grandiflora</i> DC. and <i>Kohautia tenuis</i> (Bowdich) Mabb. - both reported for the Bijagós Isles.                                                       |
| 40 B / Sept. 1847<br>B 82 / Feb. 1848 | P00478903              | Solanaceae     | <i>Schwenckia americana</i> Wahl? [1] |                                                                       | <i>Schwenckia americana</i> L.                     | Reported for Guinea-Bissau (N, S, E, B).                                                                                                                                                               |
|                                       |                        | Solanaceae     | <i>Nicotiana tabacum</i> L. [1]       |                                                                       | <i>Nicotiana tabacum</i> L.                        | Introduced and cultivated species. Native in South America.                                                                                                                                            |
| <b>CRYPTOGAMIC</b>                    |                        |                |                                       |                                                                       |                                                    |                                                                                                                                                                                                        |
|                                       |                        | Caulerpaceae   | <i>Caulerpa plumaris</i> Agb. [1]     |                                                                       | <i>Caulerpa sertularioides</i> (S.G.Gmelin) M.Howe | Lawson & Price (1969) refers this species for Guinea-Bissau based on information provided in Jardin (1851). However, John <i>et al.</i> (2004) only report its distribution in neighbouring countries. |

\* Specimen barcode refers to material housed in P Herbarium.

\*\* Data source:

[1] - Jardin (1851)

[2] - Jardin (1875)

[3] - Jardin's specimens in P Herbarium.

\*\*\* Distribution in Guinea-Bissau according to Catarino et al. (2008) (B – Bijagós Archipelago; E – East; N – North; S – South).

**Table S2.** Historical data on the principal botanical explorations of Guinea-Bissau flora (18th- early-20th centuries) with reference to collectors that are referred as has travelling through Senegambia.

| Collector name [Born-death]                          | Nationality    | Period in GB [Senegambia] | Known collecting places in GB                                  | Herbaria            |
|------------------------------------------------------|----------------|---------------------------|----------------------------------------------------------------|---------------------|
| Michel Adanson [1727-1806]                           | France         | [1749-1754] *             |                                                                | **                  |
| Georges Guerrard-Samuel Perrottet [1793-1870]        | Swiss / France | [1824-1829] *             |                                                                | **                  |
| François Mathias René Leprieur [1799-1869]           | France         | [1824-1829] *             |                                                                | **                  |
| Jean-Pierre Heudelot [1802-1837]                     | France         | [1836; 1837] *            |                                                                | **                  |
| Desiré Édélestan Stanislas Aimé Jardin [1822-1896]   | France         | 1845; 1848                | Bijagós                                                        | P                   |
| Paul Friedrich Johann Moritz Pogge [1838–1884]       | Germany        | 1880                      | Bolama                                                         | B                   |
| Henrique de Arpoare                                  | Portugal       | 1880s                     | Bolama                                                         |                     |
| Manuel Rodrigues de Carvalho [1848-1909]             | Portugal       | 1881; 1883-1884           | Bolama                                                         | COI                 |
| Jacinto António de Souza [1818-1880?]                | Portugal       | 1883-1884                 | Bolama                                                         | COI                 |
| Isaac Damasceno da Costa                             | Portugal       | c. 1886                   |                                                                |                     |
| João António Cardoso Júnior [1857-1937]              | Portugal       | 1889; 1897                | Ilhéu do Rei, Bissau and Bolama Islands                        | LISU                |
| Max Julius Dinklage [1864-1935]                      | Germany        | 1894-1922                 |                                                                | BR                  |
| Henrique Augusto Dias de Carvalho [1843-1909]        | Portugal       | 1898-1899                 | Rivers and coastal areas                                       | COI                 |
| Auguste Jean Baptiste Chevalier [1873-1956]          | France         | 1900-1907*                |                                                                | **                  |
| Joaquim Machado da Fonseca                           | Portugal       | 1910-1915                 | Cacheu, Arame, Bissorã, Mansoa, Farim, Bafatá, Buba and Cacine |                     |
| Ernesto Júlio de Carvalho e Vasconcelos [1852-1930]  | Portugal       | 1914                      |                                                                | BM, COI             |
| António Figueiredo Gomes e Sousa                     | Portugal       | 1927-1928                 | Various                                                        | B, BM, COI, K, LISC |
| Manuel Martins Baptista                              | Portugal       | 1932-1934                 | Bissalanca                                                     | COI, LISC           |
| Joaquim Viegas da Graça Espírito Santo [1901-?]      | Portugal       | 1932; 1972                | Various                                                        | BM, COI, K, LISC    |
| José Soares                                          | Portugal       | 1943-1944                 |                                                                | LISC                |
| Manuel Barcelos                                      | Portugal       | 1951                      | Bolama                                                         | COI                 |
| José Diogo Sampaio de Albuquerque d'Orey [1910-1980] | Portugal       | 1953-1954                 | Various                                                        | COI, K, LISC, LISU  |
| Amílcar Cabral [1921-1973]                           | Cabo Verde     | 1953-1954                 | Various                                                        |                     |
| José Martins Santareno                               | Portugal       | 1956                      |                                                                | LISC                |

|                                                   |          |           |                      |                  |
|---------------------------------------------------|----------|-----------|----------------------|------------------|
| António Rodrigues Fonseca<br>Raimundo [1926-?]    | Portugal | 1960-1961 | Various              | ELVE, K,<br>LISC |
| J. A. Guerra                                      | Portugal | 1960-1961 |                      | K, LISC          |
| José Vicente Cordeiro Malato-Beliz<br>[1920-1993] | Portugal | 1960-1963 |                      | ELVE,<br>LISC    |
| Manuel Fernandes Correia [1935-]                  | Portugal | 1961-1962 |                      | ELVE, K,<br>LISC |
| Joaquim Alves Pereira [1924-?]                    | Portugal | 1961-1962 |                      | K, LISC          |
| J. Crespo Ascenso                                 | Portugal | 1962-1967 |                      |                  |
| Filipe de Melo Andrade                            | Portugal | 1967      | Mansoa and<br>Bissau | BM, COI          |
| João Adolfo Herbert                               | Portugal | 1972      | Bissau               | COI              |

\*As far as can be ascertained from French sources, Adanson did not personally visit the Guinea-Bissau region. Also, the presence of Perrottet, Leprieur, Heudelot and Chevalier in this region could not be confirmed.

\*\*The herbarium specimens mentioned in some databases as originating from Guinea-Bissau are from other West African countries, such as French Guinea (Republic of Guinea) and/or Senegal.
